# Supplementary material for: Improved energy storage properties of polypropylene-based composite dielectrics by introducing surface-charged BaTiO3@chitisan ultrafine constructions
Source: Royal Society of Chemistry journal article supplement (doi:10.1039/d3tc04180h), 2024-01-01
Supplement: d3tc04180h1.pdf [file d3tc04180h1.pdf]

# Supporting Information

## **Improved Energy Storage Property of Polypropylene-based Composite Dielectrics by Introducing Surface-Charged BaTiO<sub>3</sub>@chitisan Ultrafine Constructions**

Yujie Wu<sup>1</sup>, Hang Zhao<sup>1\*</sup>, Na Zhang<sup>1</sup>, Huiqin Wang<sup>1</sup>, Chuying Zhang<sup>1</sup>, Lei Yin<sup>1</sup> and

Jinbo Bai<sup>2\*</sup>

*<sup>1</sup>International Collaborative Center on Photoelectric Technology and Nano Functional Materials,  
and Institute of Photonics & Photon-Technology, Northwest University, Xi'an 710069, China*

*<sup>2</sup>Laboratoire de Mécanique des Sols, Structures et Matériaux, CNRS UMR 8579, Centrale-Supélec,  
Université Paris-Saclay, 8-10 rue Joliot Curie, Gif-sur-Yvette, 91190, France*

*\*Correspondence: [hang.zhao@nwu.edu.cn](mailto:hang.zhao@nwu.edu.cn) (H.Z.); [jinbo.bai@centralesupelec.fr](mailto:jinbo.bai@centralesupelec.fr) (J.B)*

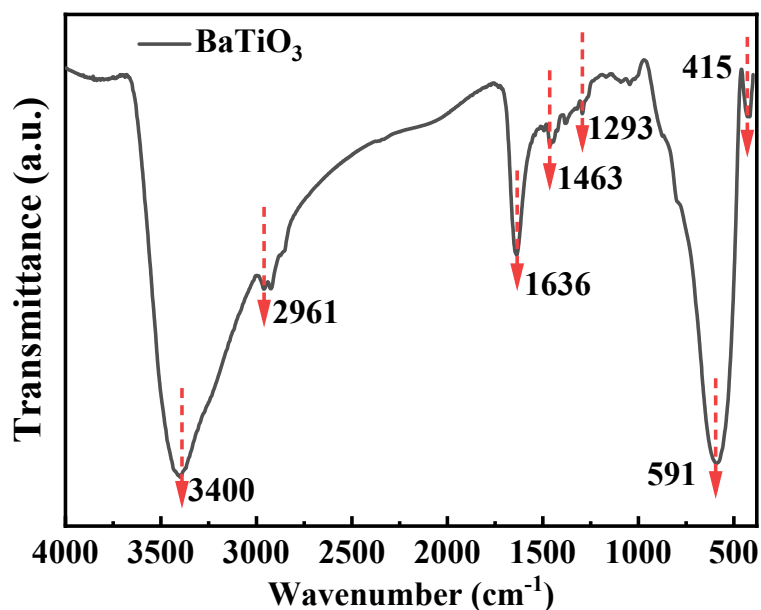

Fig. S1 FT-IR spectra of BaTiO<sub>3</sub>.

As shown in Fig. S1, the bands at 591 and 415 cm<sup>-1</sup> in the BaTiO<sub>3</sub> spectrum correspond to the characteristic vibrations of Ti-O and Ba-O, respectively, indicating the formation of a perovskite structure. The C=O band at 1636 cm<sup>-1</sup> and the C-N band at 1293 cm<sup>-1</sup> observed from the BaTiO<sub>3</sub> spectrum are the characteristic bands for PVP. The band at 1463 cm<sup>-1</sup> can be identified as the bending vibration of the C-H bond. The appearance of a band at 3400 cm<sup>-1</sup> can be assigned to the stretching vibration of the O-H bond, and the band at 2961 cm<sup>-1</sup> is assigned to the stretching vibration of the C-H bond. These characteristic peaks also indicate the existence of organic functional groups on the surface of ultrafine BaTiO<sub>3</sub> during the fabrication process.

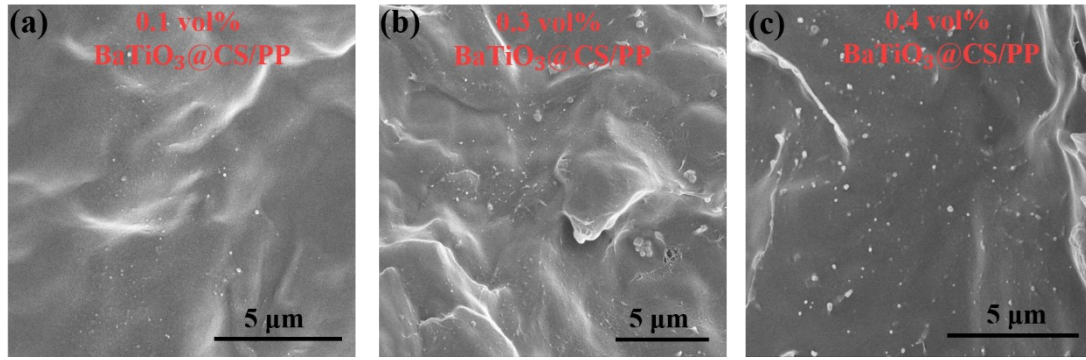

**Fig. S2** Cross-section SEM images of the BaTiO<sub>3</sub>@CS/PP composites filled with (a) 0.1vol%; (b) 0.3vol%; and (c) 0.4vol% of BaTiO<sub>3</sub>@CS nanoparticles.

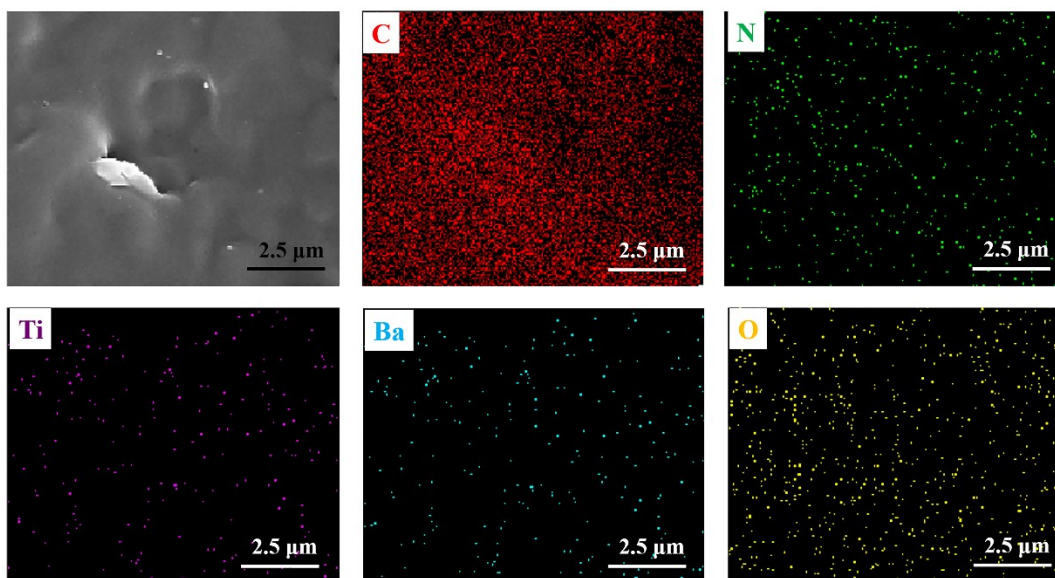

**Fig. S3** The SEM image and the EDS chemical elements distribution of BaTiO<sub>3</sub>@CS/PP composite filled with 0.2 vol% BaTiO<sub>3</sub>@CS.

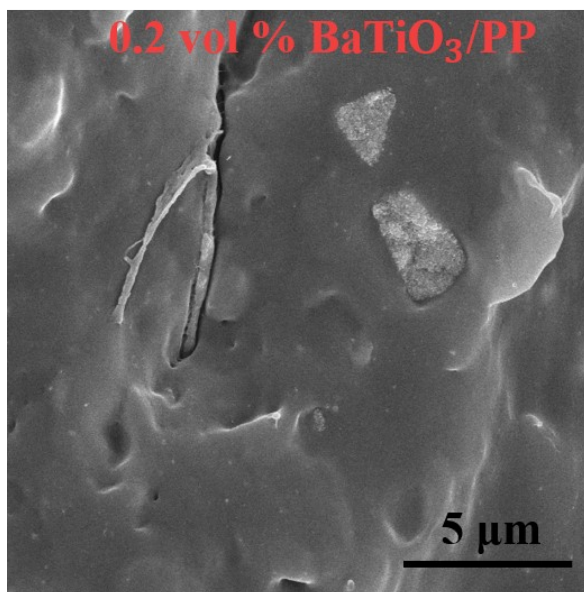

**Fig. S4** Cross-section SEM image of the BaTiO<sub>3</sub>/PP composite filled with 0.2 vol% BaTiO<sub>3</sub>.

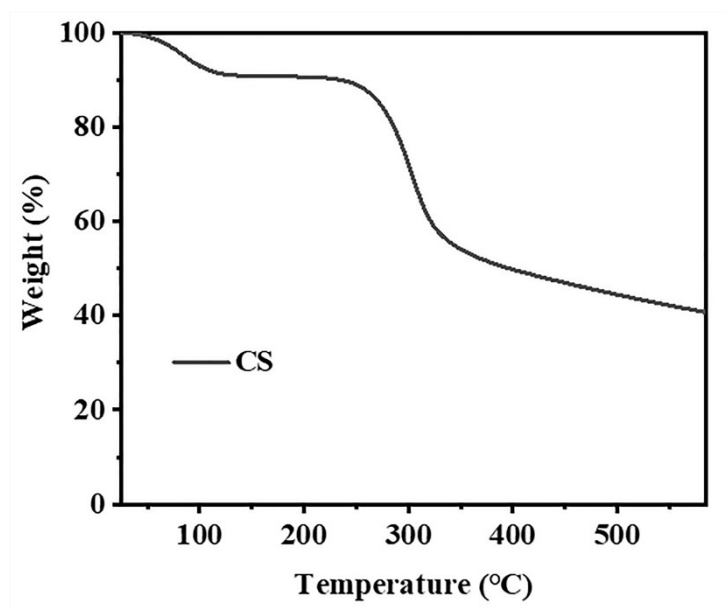

**Fig. S5** The TGA result of CS within the testing temperature range of 25 to 600 °C.

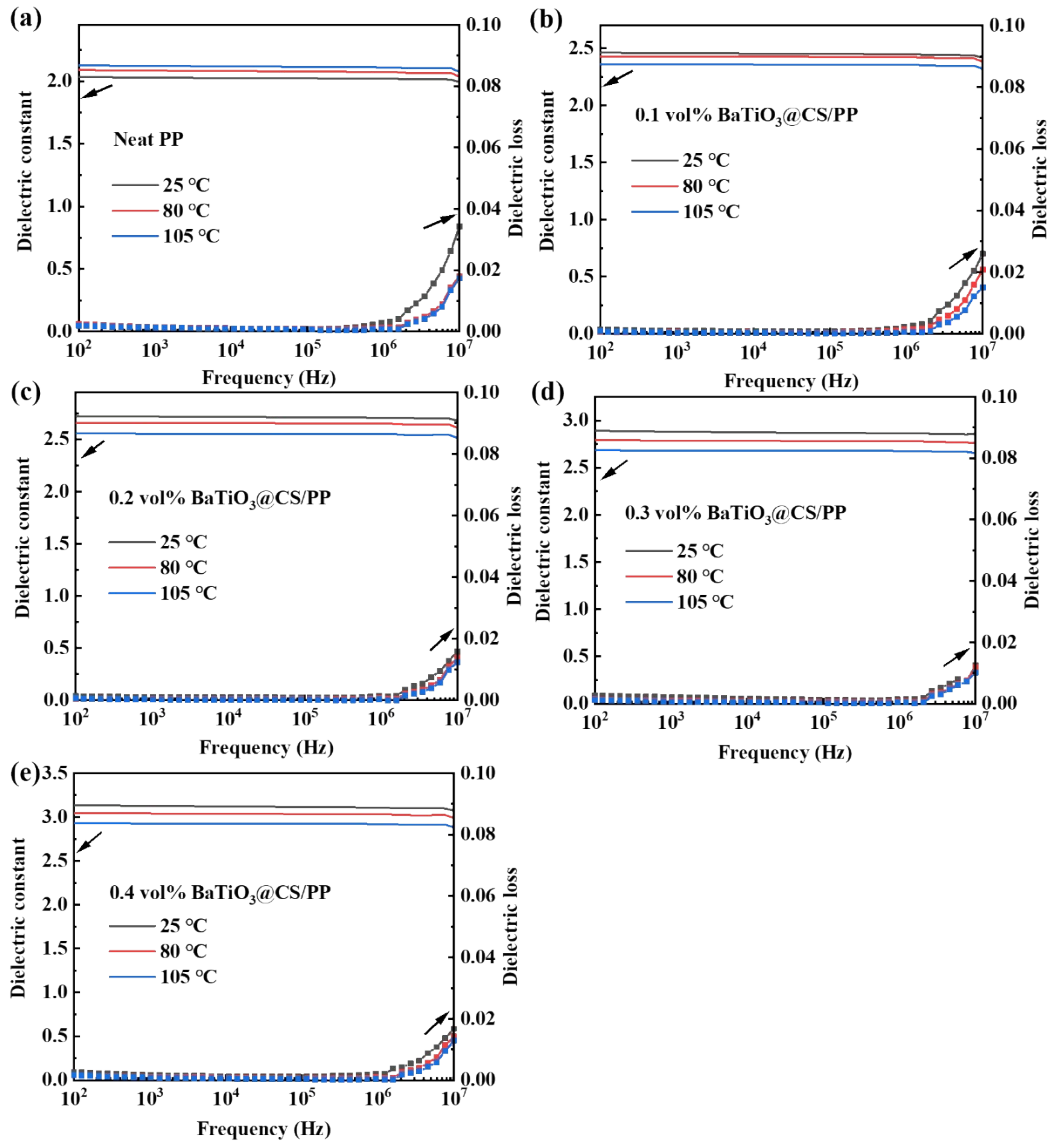

**Fig. S6** Frequency-dependent dielectric properties of PP and BaTiO<sub>3</sub>@CS/PP composites at different temperatures.

### Supplementary method 1-Weibull statistical distribution

The calculation formula is as follows:  $P(E) = 1 - \exp\left(-\left(\frac{E}{E_b}\right)^\beta\right)$ , where  $P(E)$  is the cumulative failure probability,  $E$  is the applied electric field,  $E_b$  is the characteristic breakdown strength at the cumulative failure probability of 62.8%, and  $\beta$  is the shape parameter for evaluating the dispersion of experimentally tested data. The  $\beta$  value is related to the reliability of the experimental data. The higher  $\beta$  value indicates the better structural stability of a dielectric material.



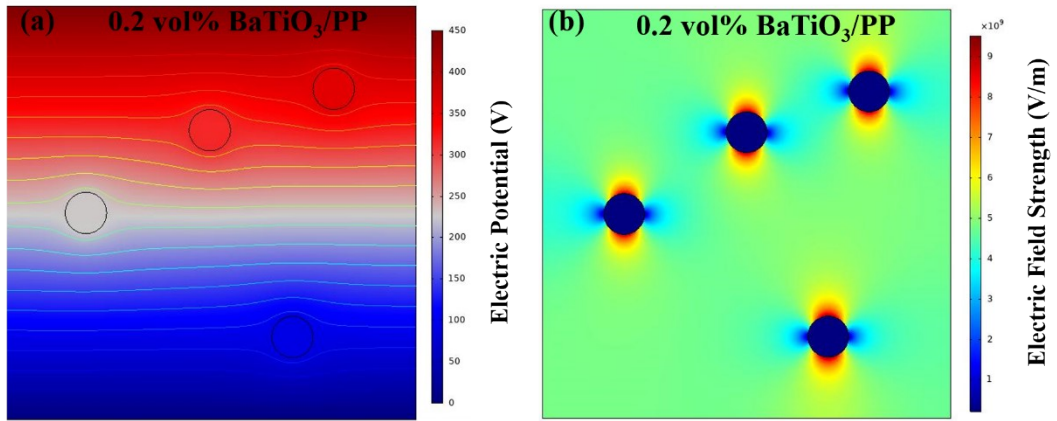

**Fig. S7** (a) Electric potential distribution; and (b) electric field distribution of 0.2 vol% BaTiO<sub>3</sub>/PP composite by the finite element simulation.

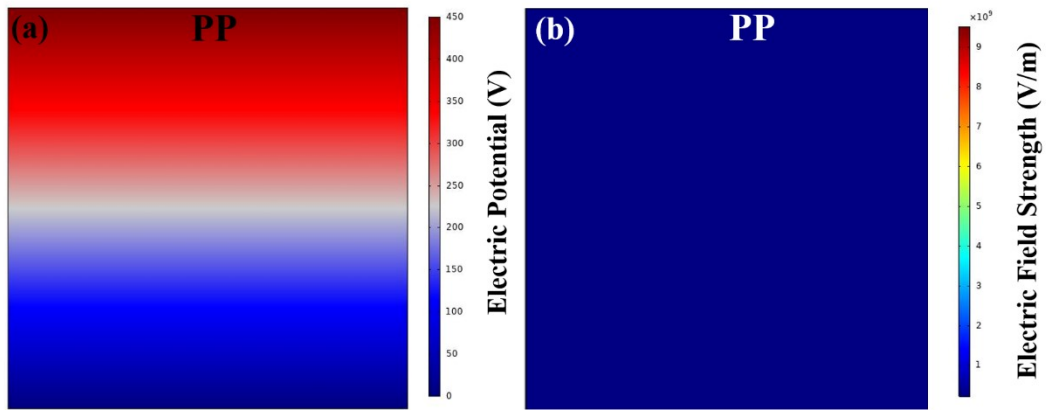

**Fig. S8** (a) Electric potential distribution; and (b) electric field distribution of PP by finite element simulation.

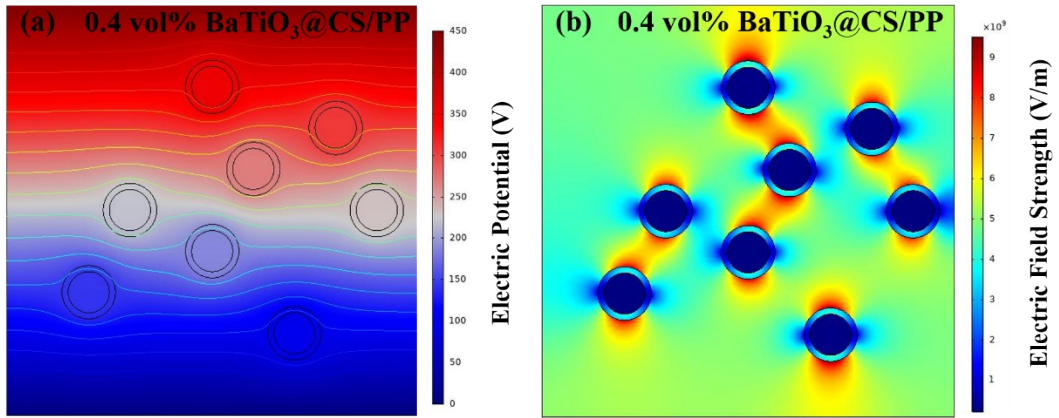

**Fig. S9** (a) Electric potential distribution; and (b) electric field distribution of 0.4 vol% BaTiO<sub>3</sub>@CS/PP composite by finite element simulation.

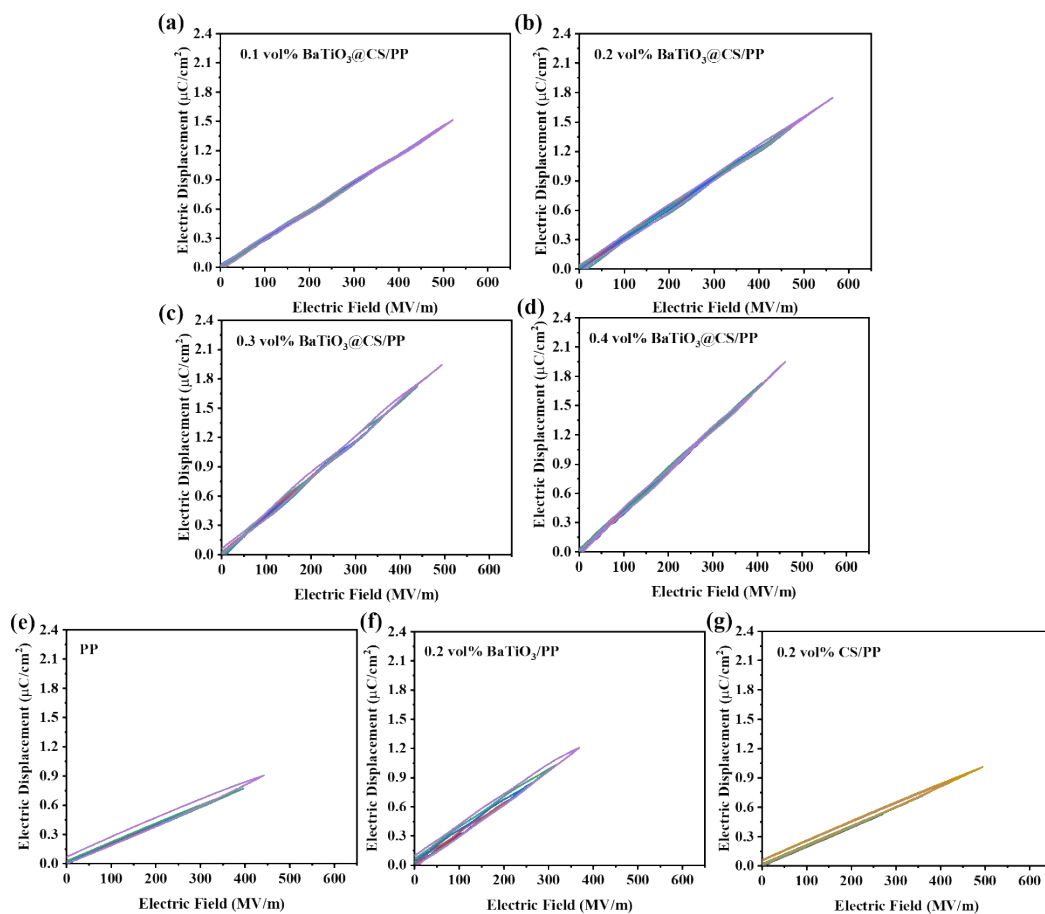

**Fig. S10** The  $D$ - $E$  loops of (a) 0.1 vol% BaTiO<sub>3</sub>@CS/PP composite; (b) 0.2 vol% BaTiO<sub>3</sub>@CS/PP composite; (c) 0.3 vol% BaTiO<sub>3</sub>@CS/PP composite (d) 0.4 vol% BaTiO<sub>3</sub>@CS/PP composite; (e) neat PP; (f) 0.2 vol% BaTiO<sub>3</sub>/PP composite and (g) 0.2 vol% CS/PP composite.

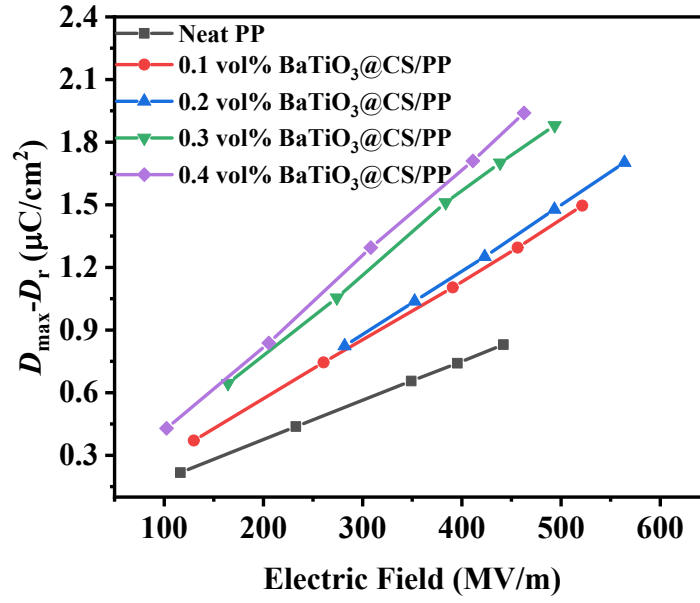

**Fig. S11**  $D_{max}-D_r$  dependence of BaTiO<sub>3</sub>@CS/PP composites with the different loading contents of BaTiO<sub>3</sub>@CS nanoparticles at varied electric fields.

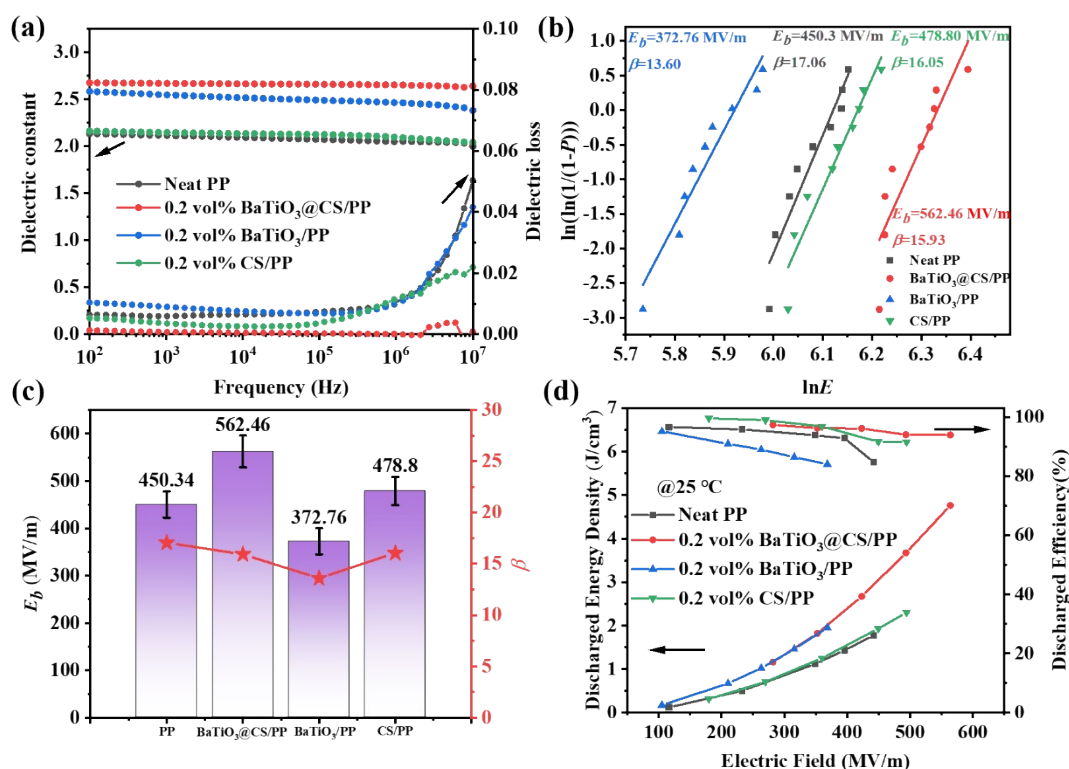

**Fig. S12** (a) Frequency dependency of dielectric constant and dielectric loss, measured at 25 °C; (b) Weibull statistic breakdown strength; (c) deduced characteristic breakdown strength; and (d) Discharged energy density and charge-discharge efficiency of PP; 0.2 vol% BaTiO<sub>3</sub>/PP composite; 0.2 vol% CS/PP composite and 0.2 vol% BaTiO<sub>3</sub>@CS/PP composite at varied electric fields.

To further verify the obtained excellent energy storage performance is originated to the well-designed electrically-charged BaTiO<sub>3</sub>@CS ultrafine nanoparticles, the comparisons of dielectric and energy storage performances among PP, BaTiO<sub>3</sub>/PP, CS/PP, and BaTiO<sub>3</sub>@CS/PP composites (filler fraction of these composites is constant as 0.2 vol%) are made and shown in Fig. S12.

To evaluate the influence of the BaTiO<sub>3</sub>@CS nanoparticles on the dielectric property of the composites, both dielectric constant and dielectric loss as a function of

frequency were studied by using broadband dielectric spectroscopy (Fig. S12 a). The  $\epsilon_r$  values of BaTiO<sub>3</sub>/PP and CS/PP composites are 2.58 and 2.16 at 100 Hz, respectively, which are slightly higher than that of neat PP. However, the BaTiO<sub>3</sub>@CS/PP composite dielectric exhibits the highest  $\epsilon_r$  value of 2.67 and the lowest  $\tan \delta$ .

The Weibull statistical distribution of PP, BaTiO<sub>3</sub>@CS/PP, BaTiO<sub>3</sub>/PP and CS/PP composite dielectrics are shown in Figs. S12 b and c. The BaTiO<sub>3</sub>@CS/PP composite shows the highest  $E_b$ , the  $E_b$  of the CS/PP composite is medium, the  $E_b$  of BaTiO<sub>3</sub>/PP composite is lowest. In fact, since the  $\epsilon_r$  values of BaTiO<sub>3</sub>/PP, CS/PP and BaTiO<sub>3</sub>@CS/PP composites are approximative, so the trend of recoverable energy storage density is similar to the trend of  $E_b$ . As shown in Fig. S12 d, the energy storage density of BaTiO<sub>3</sub>@CS/PP composite is the optimal (4.76 J/cm<sup>3</sup>), that of the CS/PP composite (2.31 J/cm<sup>3</sup>) is the medium and that of the BaTiO<sub>3</sub>/PP composite is the lowest (1.95 J/cm<sup>3</sup>). Based on the results of  $D$ - $E$  loops, the charge-discharge efficiency ( $\eta$ ) is calculated. The  $\eta$  decreases as electric field increases. Moreover, the BaTiO<sub>3</sub>@CS/PP composite shows the highest  $\eta$  of 94%, the CS/PP composite also maintains a high level of 91.5%, the lowest  $\eta$  is achieved by the BaTiO<sub>3</sub>/PP composite, with a  $\eta$  value of only 84% (Fig. S12 d). It is further confirmed that the obtained outstanding energy storage capability is mainly due to the synergistic effect of ultrafine BaTiO<sub>3</sub> and charged CS.

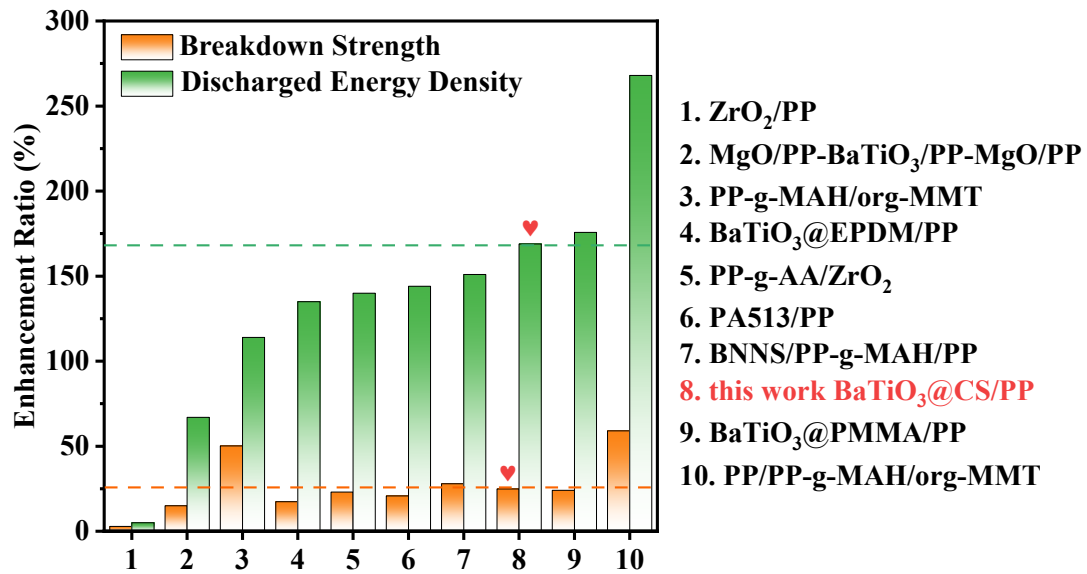

**Fig. S13** The comparison of the enhancement ratios of breakdown strength and discharged energy density of PP-based composite dielectrics that reported in this work and previously published works of literature.

Since the energy storage performance such as  $E_b$  and  $U_e$  of a composite is related to the corresponding polymer matrix, the relative enhancements in  $E_b$  (defined as  $(E_b/E_p-1) \times 100\%$ ) and  $U_e$  (defined as  $(U_e/U_p-1) \times 100\%$ ) are calculated respectively. Where  $E_p$  and  $U_p$  were used to represent the breakdown strength and discharge energy density of the polymer matrix, respectively.
